# Supplementary material
Source: PubMed Central journal article supplement (PMC6489821)

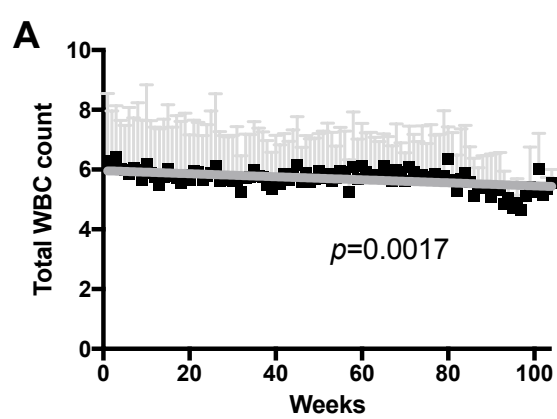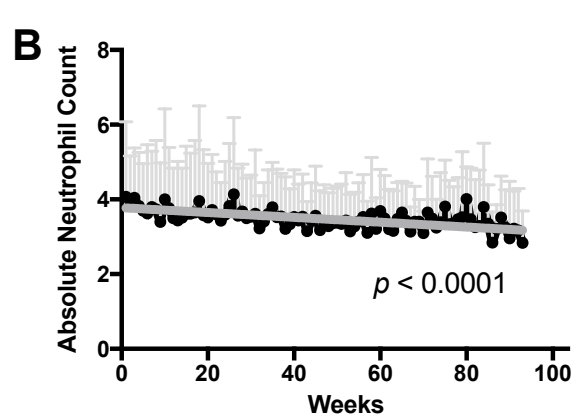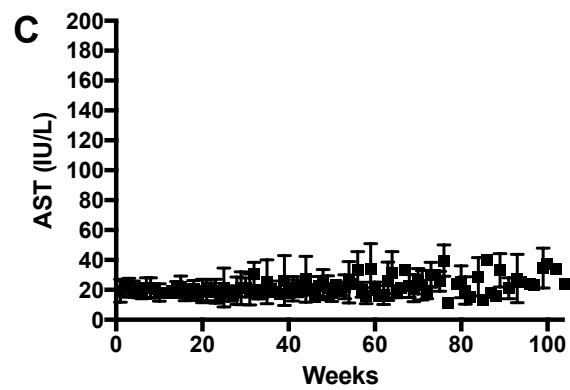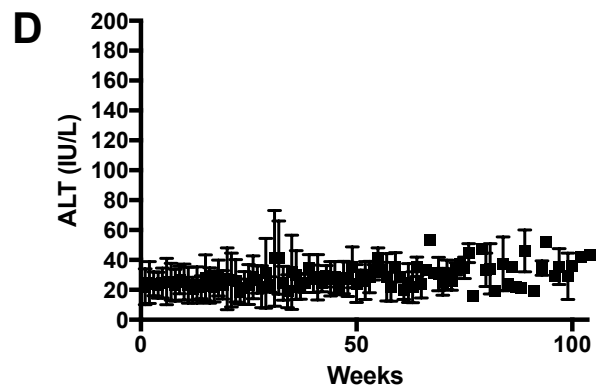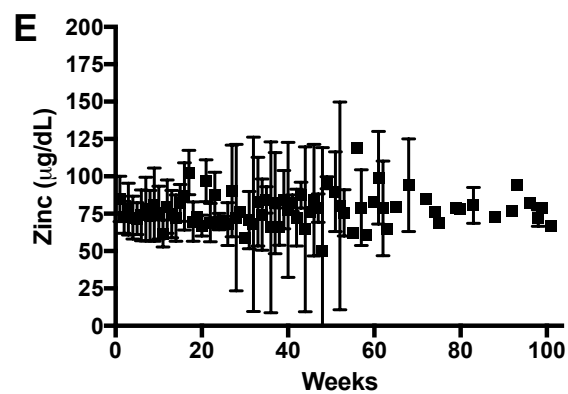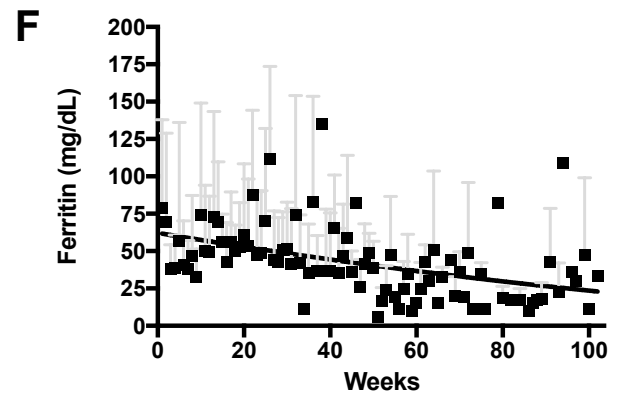

Supplement: CNS-24-187-s001.pdf [file CNS-24-187-s001.pdf]
